1 **Antibody response patterns to *Helicobacter pylori* infection in a rural Ugandan population**  
2 **cohort.**

3  
4 **Neneh Sallah<sup>1\*</sup>, Alexander Hayes<sup>1, a</sup>, Nana Osei-Tutu<sup>1, a</sup>, Julia Butt<sup>2\*</sup>, W. Thomas Johnston<sup>3</sup>,**  
5 **Gershim Asiki<sup>4</sup>, Tim Waterboer<sup>2, §</sup>, Martin L. Hibberd<sup>1, §</sup>, Robert Newton<sup>3,5, §</sup>.**

6 <sup>1</sup>London School of Hygiene & Tropical Medicine, London, U.K., <sup>2</sup>Infections and Cancer  
7 Epidemiology, Infection, Inflammation and Cancer Program, German Cancer Research Center  
8 (DKFZ), Germany, <sup>3</sup>Department of Health Sciences, University of York, U.K., <sup>4</sup>African Population  
9 and Health Research Centre, Kenya, <sup>5</sup>MRC/UVRI at London School of Hygiene & Tropical  
10 Medicine, Entebbe, Uganda

11 <sup>a</sup>Authors contributed equally to this study

12 <sup>§</sup>Joint senior authors

13 \*Authors for correspondence: Neneh Sallah, London School of Hygiene & Tropical Medicine, U.K  
14 [Neneh.Sallah@lshtm.ac.uk](mailto:Neneh.Sallah@lshtm.ac.uk), & Julia Butt, Infections and Cancer Epidemiology, Infection,  
15 Inflammation and Cancer Program, German Cancer Research Center (DKFZ), Germany,  
16 [j.butt@dkfz.de](mailto:j.butt@dkfz.de)

17  
18 Keywords: *Helicobacter pylori*, antibody, bacteria, Africa, infection

19  
20 Key Messages:

- 21 • Antibody responses to *H. pylori* antigens are found to be associated with risk of gastric cancer,  
22 however, despite the high seroprevalence in African populations, data from Africa are scarce.  
23 This is the first study of antibody response patterns and their determinants from an African  
24 population.
- 25 • Our study shows a population where *H. pylori* is ubiquitous from childhood, and seroprevalence  
26 of virulent antigens is distinctively high suggesting an increased of disease compared to other  
27 populations.

- 28 • We observe inter-individual variation in virulent antibody responses partly influenced by co-  
29 infection.
- 30 • We highlight crucial insights into antibody-based biomarkers of disease risk and reinforce the  
31 need for population-based *H. pylori* screening and treatment programmes for gastric cancer  
32 control.

33 Abstract word count: 248, Text word count: 2773

34

35 **Abstract**

36 Background: *Helicobacter pylori* (*H. pylori*) establishes life-long infection in humans in the absence  
37 of treatment and has been associated with a variety of gastrointestinal conditions including peptic  
38 ulcer and gastric cancer. Antibody responses to *H. pylori* antigens are found to be associated with  
39 disease risk, however, data from Africa are scarce.

40 Methods: To assess the seroprevalence of *H. pylori* and characterise antibody response patterns, we  
41 measured serum IgG antibody levels to 14 antigens among 7,211 individuals in a rural Ugandan  
42 population cohort. Multivariate-adjusted linear regression models were fitted to investigate the  
43 influence of age, sex, and co-infection on antibody seroreactivity levels.

44 Results: *H. pylori* seroprevalence was 95% in our study population, with 94% of individuals  
45 seropositive in childhood (<15 years). In *H. pylori* positive individuals, we found a markedly high  
46 seroprevalence (~99%) and antibody levels to the high-risk antigens CagA and VacA, in addition to  
47 Cag $\delta$ . HSV-2 co-infection was significantly associated with higher IgG levels of CagA and VacA  
48 (OR=1.10, 95% C. I.=1.05-1.16). HIV infection was associated with lowered IgG levels to CagA  
49 (OR=0.86, 95% C.I.=0.80-0.93), and HPV infection was associated with increased IgG levels to  
50 VacA (OR=1.16, 95% C.I.=1.11-1.21).

51 Conclusions: *H. pylori* in this population is ubiquitous from childhood, with a high prevalence and  
52 high seroreactivity levels of high-risk antigens, suggesting chronic active inflammatory responses in  
53 individuals that are indicative of risk of disease. Further investigation is warranted to fully understand

54 the relationship between host, immunogenicity, and clinical outcomes to better stratify by risk and  
55 improve treatment.

56

## 57 **Introduction**

58 *Helicobacter pylori* (*H. pylori*), is a gram-negative bacterium that colonises the gastric epithelium of  
59 the human host and is typically acquired in childhood via intrafamilial contact[1]. Globally, 4.4  
60 billion individuals are estimated to be infected with *H. pylori* with substantial geographic variation in  
61 prevalence ranging from ~20-50% in developed countries to ~80% in developing countries[2]. While  
62 the majority of infections are asymptomatic, in the absence of treatment, *H. pylori* can evade the  
63 host's immune responses and subsequently persist throughout a person's lifetime. Chronic *H. pylori*  
64 infection is the strongest risk factor for several gastrointestinal conditions including, peptic ulcer,  
65 chronic atrophic gastritis, and gastric cancers worldwide[3]. In 2018, *H. pylori* was responsible for  
66 810,000 (37%) new cases of cancers caused by an infectious agent and caused ~90% of non-cardia  
67 gastric cancers[3]. The relative risk of developing gastric cancer with the *H. pylori* infection is 17[4].  
68 In sub-Saharan Africa, the estimated population attributable fraction (PAF) of non-cardia gastric  
69 cancer is 92%[4]. Between the 1960s and 2008, Uganda experienced a 7-fold increase in gastric  
70 cancer incidence[5] . In 2008, The Uganda Cancer Working Group recognised that in areas of  
71 endemic *H. pylori* infection, *H. pylori* predicated the multistage process that lead to the development  
72 of gastric cancer[5]. They recommended that *H. pylori* eradication be utilised as a prevention strategy  
73 in areas with a high incidence of gastric cancer[5]. This recommendation is shared by the  
74 International Agency for Research on Cancer (IARC) working group that population-based *H. pylori*  
75 screening and treatment programmes are needed for gastric cancer control[6].

76

77 While the understanding of potential disease outcome following *H.pylori* infection is limited, it is  
78 found to be mediated by the complex interplay between bacterial virulence factors, environmental  
79 factors, lower socioeconomic status and host factors[7]. During the course of infection, chronic  
80 inflammatory changes occur as the bacterium adapts to its host and modulates the immune system.  
81 Depending on the bacterium's protein expression pattern and the host's adaptive immune response

82 distinctive antibody response patterns may result and potentially reflect virulence of the infecting  
83 bacterium. As an example, antibody responses to particular *H. pylori* antigens: CagA (cytotoxin-  
84 associated antigen A), VacA (vacuolating cytotoxin), GroEL (chaperonin GroEL), HP1564  
85 (hypothetical protein) and HcpC (conserved hypothetical secreted protein) have been identified as  
86 being associated with development of chronic atrophic gastritis and gastric cancers[8, 9]. A recent  
87 study characterised the dynamics of antibody responses to 15 antigens in a healthy German  
88 population-based cohort with a *H. pylori* seroprevalence of 48% and found multiple seropositivity and  
89 higher antibody levels associated with increasing age, suggestive of persistent infection and lifelong  
90 stimulation of immune responses[10]. Despite the high seroprevalence in African populations, there  
91 is a paucity of data, particularly from the continent compared to other populations[11, 12]. To better  
92 understand the relationship between host and pathogen in individuals the investigation of distinctive  
93 antibody patterns and factors that could potentially lead to disease following chronic infection is  
94 essential. Therefore, in this study, we assess the seroprevalence of *H. pylori* and antibody patterns  
95 against 14 antigens in a rural African population cohort and explore the factors associated with inter-  
96 individual variation in antibody response.

97

## 98 **Methods**

### 99 **Sample selection and ethics**

100 The General Population Cohort (GPC) is a population-based cohort in rural south-west Uganda  
101 consisting of 25 neighbouring villages inhabited mainly by farmers[13, 14]. The Baganda are the  
102 predominant tribal group constituting ~70% of the population, with a substantial number of migrants  
103 who settled from neighbouring Rwanda. Blood samples from 7,211 GPC study participants,  
104 representing 11 self-reported ethnolinguistic groups, were collected during census and medical survey  
105 sampling rounds conducted in the study area in 1992, 2000 and 2008, as described previously[13].  
106 Serum was tested for infections and the remainder was stored at -80 degrees Celsius in freezers in  
107 Entebbe prior to further serological testing. Informed consent was obtained from all participants either  
108 in conjunction with parental/guardian consent for under 18-year olds with signature or a thumbprint if  
109 the individual was unable to write. The study was approved by the Uganda Virus Research Institutes,

110 Research Ethics committee (UVRI-REC) (Ref. GC/127/10/10/25), the Uganda National Council for  
111 Science and Technology (UNCST) and the London School of Hygiene & Tropical Medicine  
112 (LSHTM) Ethics Committee (reference number 17686).

113

#### 114 **Helicobacter pylori multiplex serology**

115 We quantified mean fluorescent intensity (MFI) of IgG antibodies to 14 *H. pylori* antigens using  
116 multiplex serology on the Luminex® platform based on glutathione-S-transferase (GST) fusion  
117 capture immunosorbent assays combined with fluorescent bead technology as previously  
118 described[15]. The 14 recombinant affinity purified *H. pylori* proteins that were used as antigens  
119 were: CagA (cytotoxin-associated antigen A), GroEL (chaperonin GroEL), HP1564 (hypothetical  
120 protein protein HP1564), VacA (vacuolating cytotoxin), HP0231 (hypothetical protein HP0231),  
121 HP0305 (hypothetical protein HP0305), HpaA (neuraminyllactose-binding hemagglutinin homolog),  
122 Cag $\delta$  (cag pathogenicity island protein  $\delta$ ), HyuA (hydantoin utilization protein A), CagM (cag  
123 pathogenicity island protein M), Catalase, HcpC (conserved hypothetical secreted protein - paralogue  
124 HcpA induces IFN $\gamma$ ), NapA (neutrophil activating protein (bacterioferritin)) and UreA (urease alpha  
125 subunit). Antibody seropositivity was defined as reactivity greater than the antigen-specific cut-off.  
126 *H. pylori* seropositivity was defined as seropositivity to at least 4 antigens as described previously[10,  
127 15].

128

#### 129 **Statistical analysis of variability in antibody responses**

130 Statistical significance of differences in continuous variables, i.e. antibody reactivities (MFI values)  
131 and multiple seropositivity (number of antigens recognized) were analysed with the Wilcoxon two  
132 sample signed rank sum test. Fisher's Exact test was used to test for differences in dichotomous  
133 variables, i.e. *H. pylori* seropositivity and antibody seroprevalence. All tests were performed two-  
134 sided. Analyses were performed with R software version 3.4. P-values below 0.05 were considered  
135 statistically significant. Pairwise-correlation between antigens for seropositive individuals were tested  
136 using Spearman's rank-based test in R. We also investigated factors influencing IgG antibody  
137 response levels to *H. pylori* antigens. Antibody levels were log<sub>10</sub> transformed and multivariate linear

138 regression models were fitted to examine variables predictive of antibody levels. The variables tested  
139 were: sex, age/age group (categorized as 0-14, 15-24, 25-44 or  $\geq 45$  years), census (sampling) year  
140 (1992, 2000 or 2008) and infection status for Epstein-Barr virus (EBV), Hepatitis B virus (HBV),  
141 Hepatitis C virus (HCV), Human-immunodeficiency virus (HIV), Human papillomavirus (HPV) high  
142 risk types 16 and 18, Herpes simplex virus type 2 (HSV-2), Human T-lymphotropic virus (HTLV-1),  
143 Kaposi's sarcoma-associated herpesvirus (KSHV), and Merkel cell polyomavirus (MCV). A multiple  
144 testing  $p$ -value of  $<0.005$  adjusted for all variables was used to determine statistical significance  
145 unless specified otherwise.

146

## 147 **Results**

### 148 ***Helicobacter pylori* seroprevalence in the GPC.**

149 In this study, we analysed the sera of 7,211 individuals between the ages of 0-98 years (median=16,  
150 IQR=10-35) for antibody responses to 14 different *H. pylori* antigens: CagA, GroEL, HP1564, VacA,  
151 HP0231, HP0305, HpaA, Cag $\delta$ , HyuA, CagM, Catalase, HcpC, NapA, and UreA. We categorised  
152 95% of individuals as seropositive for *H. pylori* infection based on reactivity to at least 4 antigens  
153 (Table 1). While *H. pylori* seroprevalence was similar for both sexes (males 95.5% vs females 94%),  
154 we found that in the 25-44 years age group seroprevalence was significantly higher in males (97.3%)  
155 compared to females (94.9%) ( $p=0.03$ ) (Figure 1). We also found that seroprevalence was  
156 significantly higher ( $>2\%$ ) in the oldest age group (45+) compared to the youngest age group (0-14)  
157 for both males ( $p=0.02$ ) and females ( $p=0.01$ ) (Figure 1). Seroprevalence was also similarly high  
158 across census years (94-96%) (Table1). Seroreactivity to multiple antigens was high (median=8.7,  
159 IQR=7-11) with 3375 individuals (47%) testing seropositive for  $>9$  antigens (Supplementary Figure  
160 1.A). We found no significant differences in the number of antigens recognised across age groups or  
161 between sexes ( $P>0.05$ ) (Supplementary Figure 1.B). We compared the seroprevalences of all  
162 antibodies to the 14 antigens in seropositive (HP+) vs seronegative (HP-) individuals and found that  
163 antibody seroprevalences were significantly higher in HP+ compared to HP- sera for all antigens  
164 ( $p<0.0001$ ) (Table2). In the 6,834 *H. pylori* seropositive individuals, antibodies to CagA, VacA and

165 Cag $\delta$  were the highest with ~99% seroprevalence and antibodies to NapA and HcpC had the lowest  
166 seroprevalence being less than 50% (Table2).

167

### 168 **Helicobacter pylori antibody response levels**

169 Using the multiplex flow immunoassay, we quantified the antibody levels of response to the 14  
170 different *H. pylori* antigens. In *H. pylori* positive and antigen-specific antibody positive individuals,  
171 we observed variation in antibody responses with the highest IgG levels observed for CagA (max=  
172 66,614, median=13,793, IQR=10,138-18,298) followed by VacA (max=28,722, median=2,809,  
173 IQR=1641-4600), HP1564 (max=22,526, median:2776, IQR=1341-4640) and Cag $\delta$  (max=15,044,  
174 median:2,206, IQR=1,293-3,609), all other antibody responses had medians below 2000 with HpaA  
175 having the lowest median IgG level (max= 10,783, median:335, IQR:182-751) (Figure 2.). There was  
176 a modest correlation between all antigens ( $\rho$ =-0.01-0.51) (Supplementary Figure S2), with the  
177 strongest correlation being observed for HP0305 and HP1564 ( $\rho$ =0.51) (Supplementary Figure S2).

178

179 We investigated the association between intrinsic factors, age, sex and sampling year to inter-  
180 individual variation in antibody response levels in seropositive individuals using a multivariable linear  
181 regression model for each antibody (Table 3). We found that higher age groups in comparison to the  
182 youngest age group (0-14) were significantly associated with decreased antibody levels to CagA,  
183 HP1564, VacA and HP0231 (ORs between 0.84-99) (Table 3). In contrast, higher age groups were  
184 significantly associated with increased antibody levels to GroEL, Cag $\delta$ , HyuA, NapA, HcpC and  
185 UreA (ORs between 1.01-1.21) in comparison to the youngest age group (Table 3). Being female  
186 was significantly associated ( $p$ <0.0125) with lower antibody responses to HP1564, HP0305, Cag $\delta$ ,  
187 HyuA and Catalase (ORs between 0.91-99) (Table 3) compared to being male.

188

### 189 **The influence of co-infection on Helicobacter pylori antibody responses**

190 We then investigated the seroprevalence of co-infection in 1,735 individuals (aged 1-91 years,  
191 median= 31) that had a record of infection serostatus for nine additional pathogens. We found that in

192 1,679 (97%) *H.pylori* positive individuals there was a high burden of co-infection, particularly with  
193 Epstein-Barr Virus (EBV) and Kaposi's Sarcoma-associated herpesvirus (KSHV) (93%) (Figure 3.A.)  
194 followed by Herpes-simplex virus-2 (HSV-2) (67%), Human Papilloma Virus (HPV) (35%) and  
195 Hepatitis B Virus (HBV) (13%). The remaining four pathogens were <10% with Human T  
196 lymphotropic virus-1 (HTLV-1) having the lowest seroprevalence (~1%) (Figure 3.A.). Most  
197 individuals (~70%) were co-infected with at least four pathogens (Figure 3.B).

198

199 We then investigated the influence of co-infection on inter-individual variation in antibody response  
200 levels to the five virulent *H. pylori* antigens, CagA, VacA, GroEL, HcpC and HP1564, in *H.pylori*  
201 seropositive individuals using multivariable linear regression models adjusting for age, sex, sampling  
202 year and infection status. Of the infections tested (Figure 3. A), HIV co-infection resulted in  
203 significantly lowered antibody responses to CagA, HcpC, and HP1564 (OR= 0.55-0.93) (Table 4).  
204 HSV-2 co-infection was associated with moderately higher levels of CagA and VacA (OR= 1.05-  
205 1.16) but no other antibodies (Table 4). HPV co-infection was significantly associated with higher  
206 antibody levels (OR= 1.11-1.45) to VacA and GroEL antigens (Table 4). None of the other co-  
207 infections had significant effects on variation for any antibody response ( $p>0.004$ ) (Table 4).

208

## 209 **Discussion**

210 Data on *Helicobacter pylori* antibody response patterns and their determinants are limited, with most  
211 studies having been conducted in Western and non-African populations, there is a paucity of data  
212 particularly from Africa. Here, we present the first population-based study to characterise *H. pylori*  
213 antibody response patterns to 14 antigens and their determinants in ~7000 individuals from an African  
214 population. The presence of antibodies representing host immune response is commonly used as  
215 diagnostic markers for the stage of infection [16] and for *H.pylori* they have been found to be  
216 associated with disease risk[8, 9]. In the GPC, prevalence estimates of *H. pylori* of ~94% are higher  
217 than previous findings in Uganda and more broadly in developing countries[17-21]. Here, we see a  
218 population with a high seroprevalence of >90% from childhood, much higher than previously  
219 observed in Uganda of 44%; a seroprevalence higher than in other African countries, with studies



220 reporting estimates in children ranging from 14% in Ghana to 73% in Kenya[11, 12, 17, 22]. We  
221 observed slightly higher seroprevalence in the highest age group compared to the lowest age groups  
222 ( $p < 0.05$ ), consistent with previous findings in other populations. In comparison to a previous study of  
223 German individuals[10] that assessed the presence of the 14 antigens tested here, we observed a 2-  
224 fold increase in seropositivity to *H. pylori* (95% in the GPC vs 48% in Germans). In *H. pylori*  
225 seropositive individuals, we observed >90% seropositivity to the following antibodies: CagA,  
226 HP1564, VacA and Cag $\delta$ , which was much higher than reported in previous studies. The highest  
227 difference in seroprevalence (2.7-fold) was observed for CagA (90% vs 33% Germans). For the  
228 following antigens: Cag $\delta$ , HP0231, HpaA, CagM and Catalase we also observed a >2-fold difference  
229 in seroprevalence with higher estimates in Ugandans compared to Germans. The lowest difference in  
230 seroprevalence was observed for HcpC, 1.17-fold higher in Ugandans compared to Germans. Another  
231 study in adults from high-risk gastric cancer areas of Latin America also reported lower antibody  
232 seroprevalences compared to our study, including for CagA (74%) and VacA (71%) despite an overall  
233 *H. pylori* seroprevalence of 85%[23]. Differences in seropositivity have also been reported in a low-  
234 income population in the U.S.A that had a higher *H. pylori* seropositivity 89% compared to the  
235 general US population (~30%), thought to be driven by lower socio-economic status[24]. They also  
236 observed higher seroprevalence in and higher in African Americans 79% compared to 69% in whites  
237 in addition to higher antibody seroprevalence for 12 out of the 14 antigens tested here, particularly  
238 for CagA, with a 2.6-fold increase in African Americans (68%) compared to white Americans  
239 (26%)[24]. This could be suggestive of higher seroprevalence in individuals with African ancestry.  
240 While seroprevalence estimates of CagA in Africa are scarce, the ubiquity of CagA in the GPC  
241 mirrors estimates in East Asian countries where the risk of gastric cancers due to *H. pylori* are higher  
242 than the rest of the world[3, 25]. CagA and VacA are the most well studied virulence factors of *H.*  
243 *pylori* and are essential for bacterial persistence in the stomach in addition to possessing oncogenic  
244 potential. CagA-host interaction induce a state of chronic inflammation which worsens over time and  
245 has been associated with an increased risk of gastric cancers, peptic ulcers, and other  
246 complications[26-28]. Studies that have evaluated antibody response levels to CagA and VacA report

247 high antibody levels are associated with gastric mucosal inflammation, the grade of histological  
248 gastritis, and gastric cancer risk[29, 30]. It is interesting to observe such high seropositivity and  
249 immunogenicity to the high-risk serotypes, CagA and VacA in the GPC compared to non-African  
250 populations. A recent study in individuals in Southeast USA also found significantly higher levels of  
251 antibodies to CagA and VacA in African Americans compared to whites[31] that was likely driven by  
252 differences in ancestry.

253

254 Differences in antibody responses compared to other populations could occur as a result of multiple  
255 factors particularly, host genetic and environmental variation. In the GPC, a high burden of co-  
256 infection exists, with most individuals having up to four infections (Figure 3), therefore we sought to  
257 investigate whether inter-individual variation in antibody responses to the five virulent antigens  
258 CagA, VacA, HP1564, HcpC and GroEL was influenced by co-infection with pathogens previously  
259 reported to have oncogenic potential[3]. Out of the infections tested, only HIV, HSV-2 and HPV  
260 (high risk genotypes 16 or 18) co-infection influenced antibody levels. We found that while HIV  
261 infection was associated with decreased antibody responses (OR=0.53-0.99), co-infection with HSV-2  
262 or HPV were significantly associated with moderate increases in antibody responses (OR=1.05-1.45)  
263 (Table 4). Co-infections can cause an imbalance in host immune system, likely modulating shared  
264 inflammatory pathways and thus, resulting in antibody variation[32-35]. However, as effect sizes in  
265 this study are small, they only partially explain inter-individual differences in antibody patterns.

266

267 In summary, we characterised antibody response patterns to 14 *H. pylori* antigens in ~7,000  
268 individuals from a rural Ugandan population cohort and identified factors associated with  
269 inter-individual variation in response. A major finding of this study is that *H. pylori*  
270 seropositivity is ubiquitous from childhood (94%), and higher than previous reports in  
271 Uganda and other countries which could be due to lower-socioeconomic status in this cohort  
272 compared to urban areas. We also found that antigen specific seropositivity to the 14 antigens  
273 tested here, particularly for CagA, are higher than for non-African populations. Inter-

274 individual variation in antibody responses was partly explained by HIV, HSV-2 and HPV co-  
275 infections, suggesting other factors not examined here such as host genetics might be  
276 important. These insights are useful to better stratify individuals at risk of developing adverse  
277 outcomes following infection, as this population sustains such high levels of *H. pylori*,  
278 further investigation will be essential to inform appropriate therapeutic interventions to  
279 prevent disease in those at risk. Future studies would need to assess the relationship between  
280 antibody responses and clinical outcomes, and also investigate the relationship between host  
281 genetic variation and antibody variation to fully understand disease risk and population  
282 specific differences that are not explained by environmental variation.

283

#### 284 **Acknowledgements**

285 We thank all study participants who contributed to this study and acknowledge the support of the  
286 MRC/UVRI & LSHTM Uganda Research Unit

287

#### 288 **Funding**

289 The GPC is jointly funded by the UK Medical Research Council (MRC) and the UK Department for  
290 International Development (DFID) under the MRC/DFID Concordat agreement. Additional financial  
291 support for accessing serological samples was provided by a Wellcome Trust Clinical Training  
292 Fellowship awarded to Dr Katie Wakeham for work on the Kaposi's sarcoma associated herpesvirus  
293 (Grant number: 090132).

294

#### 295 **Author Contributions**

296 N.S, R.N. ,T.W. & M.L.H. designed the study. N.S & R.N wrote the manuscript. J.B & T.W  
297 performed phenotype assay development and validation. W.T.J, carried out curation of the cohort data  
298 and managed the database. N.S, A.H & N.O carried out all statistical analyses and data visualisation.  
299 N.S, R.N. & J.B. interpreted the results. G.A was the programme leader for the GPC. All authors  
300 commented on the interpretation of the results, reviewed and approved the final manuscript.

301

302 **Conflict of interest**

303 None

304

305

306 **References**

307

308 1. Weyermann M, Rothenbacher D, Brenner H. Acquisition of *Helicobacter pylori* infection in

309 early childhood: independent contributions of infected mothers, fathers, and siblings. *Am J*

310 *Gastroenterol.* 2009;104(1):182-9. Epub 2008/12/23. doi: 10.1038/ajg.2008.61. PubMed PMID:

311 19098867.

312 2. Hooi JKY, Lai WY, Ng WK, Suen MMY, Underwood FE, Tanyingoh D, et al. Global

313 Prevalence of *Helicobacter pylori* Infection: Systematic Review and Meta-Analysis.

314 *Gastroenterology.* 2017;153(2):420-9. Epub 2017/05/01. doi: 10.1053/j.gastro.2017.04.022. PubMed

315 PMID: 28456631.

316 3. de Martel C, Georges D, Bray F, Ferlay J, Clifford GM. Global burden of cancer attributable

317 to infections in 2018: a worldwide incidence analysis. *Lancet Glob Health.* 2020;8(2):e180-e90. Epub

318 2019/12/22. doi: 10.1016/S2214-109X(19)30488-7. PubMed PMID: 31862245.

319 4. Parkin DM, Hammerl L, Ferlay J, Kantelhardt EJ. Cancer in Africa 2018: The role of

320 infections. *Int J Cancer.* 2019. Epub 2019/06/30. doi: 10.1002/ijc.32538. PubMed PMID: 31254479.

321 5. M. Galukande M, A. Luwaga, J. Jombwe, J. Fualal, J. Kigula-Mugamba, A. Kanyike, et al.

322 Gastric Cancer Diagnosis and Treatment guidelines 2008: Uganda Cancer Working Group. *East and*

323 *Central African Journal of Surgery.* 2008;13(2):142-9.

324 6. Herrero R, Park JY, Forman D. The fight against gastric cancer - the IARC Working Group

325 report. *Best Pract Res Clin Gastroenterol.* 2014;28(6):1107-14. Epub 2014/12/03. doi:

326 10.1016/j.bpg.2014.10.003. PubMed PMID: 25439075.

327 7. van Amsterdam K, van Vliet AH, Kusters JG, van der Ende A. Of microbe and man:

328 determinants of *Helicobacter pylori*-related diseases. *FEMS Microbiol Rev.* 2006;30(1):131-56. Epub

329 2006/01/28. doi: 10.1111/j.1574-6976.2005.00006.x. PubMed PMID: 16438683.

- 330 8. Gao L, Michel A, Weck MN, Arndt V, Pawlita M, Brenner H. Helicobacter pylori infection  
331 and gastric cancer risk: evaluation of 15 H. pylori proteins determined by novel multiplex serology.  
332 Cancer Res. 2009;69(15):6164-70. Epub 2009/07/16. doi: 10.1158/0008-5472.CAN-09-0596.  
333 PubMed PMID: 19602590.
- 334 9. Gao L, Weck MN, Michel A, Pawlita M, Brenner H. Association between chronic atrophic  
335 gastritis and serum antibodies to 15 Helicobacter pylori proteins measured by multiplex serology.  
336 Cancer Res. 2009;69(7):2973-80. Epub 2009/03/26. doi: 10.1158/0008-5472.CAN-08-3477. PubMed  
337 PMID: 19318564.
- 338 10. Michel A, Pawlita M, Boeing H, Gissmann L, Waterboer T. Helicobacter pylori antibody  
339 patterns in Germany: a cross-sectional population study. Gut Pathog. 2014;6:10. Epub 2014/05/02.  
340 doi: 10.1186/1757-4749-6-10. PubMed PMID: 24782915; PubMed Central PMCID:  
341 PMCPMC4004453.
- 342 11. Smith S, Fowora M, Pellicano R. Infections with Helicobacter pylori and challenges  
343 encountered in Africa. World J Gastroenterol. 2019;25(25):3183-95. Epub 2019/07/25. doi:  
344 10.3748/wjg.v25.i25.3183. PubMed PMID: 31333310; PubMed Central PMCID: PMCPMC6626727.
- 345 12. Zamani M, Ebrahimitabar F, Zamani V, Miller WH, Alizadeh-Navaei R, Shokri-Shirvani J, et  
346 al. Systematic review with meta-analysis: the worldwide prevalence of Helicobacter pylori infection.  
347 Alimentary Pharmacology & Therapeutics. 2018;47(7):868-76. doi: 10.1111/apt.14561.
- 348 13. Asiki G, Murphy G, Nakiyingi-Miiró J, Seeley J, Nsubuga RN, Karabarinde A, et al. The  
349 general population cohort in rural south-western Uganda: a platform for communicable and non-  
350 communicable disease studies. Int J Epidemiol. 2013;42(1):129-41. Epub 2013/02/01. doi:  
351 10.1093/ije/dys234. PubMed PMID: 23364209; PubMed Central PMCID: PMCPMC3600628.
- 352 14. Nunn AJ, Mulder DW, Kamali A, Ruberantwari A, Kengeya-Kayondo J-F, Whitworth J.  
353 Mortality associated with HIV-1 infection over five years in a rural Ugandan population: cohort  
354 study. BMJ. 1997;315:767-71. doi: 10.1136/bmj.315.7111.767.
- 355 15. Michel A, Waterboer T, Kist M, Pawlita M. Helicobacter pylori multiplex serology.  
356 Helicobacter. 2009;14(6):525-35. Epub 2009/11/06. doi: 10.1111/j.1523-5378.2009.00723.x. PubMed  
357 PMID: 19889070.

- 358 16. Morrison BJ, Labo N, Miley WJ, Whitby D. Serodiagnosis for tumor viruses. *Seminars in*  
359 *oncology*. 2015;42:191-206. doi: 10.1053/j.seminoncol.2014.12.024. PubMed PMID: 25843726.
- 360 17. Aitila P, Mutyaba M, Okeny S, Ndawula Kasule M, Kasule R, Ssedyabane F, et al.  
361 Prevalence and Risk Factors of *Helicobacter pylori* Infection among Children Aged 1 to 15 Years at  
362 Holy Innocents Children's Hospital, Mbarara, South Western Uganda. *J Trop Med*.  
363 2019;2019:9303072. Epub 2019/04/16. doi: 10.1155/2019/9303072. PubMed PMID: 30984271;  
364 PubMed Central PMCID: PMC6431523.
- 365 18. Hestvik E, Tylleskar T, Kaddu-Mulindwa DH, Ndeezi G, Grahnquist L, Olafsdottir E, et al.  
366 *Helicobacter pylori* in apparently healthy children aged 0-12 years in urban Kampala, Uganda: a  
367 community-based cross sectional survey. *BMC Gastroenterol*. 2010;10:62. Epub 2010/06/18. doi:  
368 10.1186/1471-230X-10-62. PubMed PMID: 20553588; PubMed Central PMCID: PMC2901381.
- 369 19. Ankarklev J, Hestvik E, Lebbad M, Lindh J, Kaddu-Mulindwa DH, Andersson JO, et al.  
370 Common coinfections of *Giardia intestinalis* and *Helicobacter pylori* in non-symptomatic Ugandan  
371 children. *PLoS Negl Trop Dis*. 2012;6(8):e1780. Epub 2012/09/07. doi:  
372 10.1371/journal.pntd.0001780. PubMed PMID: 22953010; PubMed Central PMCID:  
373 PMC3429385.
- 374 20. Newton R, Ziegler JL, Casabonne D, Carpenter L, Gold BD, Owens M, et al. *Helicobacter*  
375 *pylori* and cancer among adults in Uganda. *Infect Agent Cancer*. 2006;1:5. Epub 2006/12/08. doi:  
376 10.1186/1750-9378-1-5. PubMed PMID: 17150134; PubMed Central PMCID: PMC1660530.
- 377 21. Baingana RK, Kiboko Enyaru J, Davidsson L. *Helicobacter pylori* infection in pregnant  
378 women in four districts of Uganda: role of geographic location, education and water sources. *BMC*  
379 *Public Health*. 2014;14:915. Epub 2014/09/06. doi: 10.1186/1471-2458-14-915. PubMed PMID:  
380 25190150; PubMed Central PMCID: PMC4164757.
- 381 22. Awuku YA, Simpong DL, Alhassan IK, Tuoyire DA, Afaa T, Adu P. Prevalence of  
382 *helicobacter pylori* infection among children living in a rural setting in Sub-Saharan Africa. *BMC*  
383 *Public Health*. 2017;17(1):360. Epub 2017/04/26. doi: 10.1186/s12889-017-4274-z. PubMed PMID:  
384 28438158; PubMed Central PMCID: PMC5404296.

- 385 23. Camargo MC, Beltran M, Conde-Glez CJ, Harris PR, Michel A, Waterboer T, et al.  
386 Serological response to *Helicobacter pylori* infection among Latin American populations with  
387 contrasting risks of gastric cancer. *Int J Cancer*. 2015;137(12):3000-5. Epub 2015/07/17. doi:  
388 10.1002/ijc.29678. PubMed PMID: 26178251; PubMed Central PMCID: PMC4817269.
- 389 24. Epplein M, Signorello LB, Zheng W, Peek RM, Jr., Michel A, Williams SM, et al. Race,  
390 African ancestry, and *Helicobacter pylori* infection in a low-income United States population. *Cancer*  
391 *Epidemiol Biomarkers Prev*. 2011;20(5):826-34. Epub 2011/03/02. doi: 10.1158/1055-9965.EPI-10-  
392 1258. PubMed PMID: 21357376; PubMed Central PMCID: PMC3089670.
- 393 25. Hatakeyama M. *Helicobacter pylori* CagA and gastric cancer: a paradigm for hit-and-run  
394 carcinogenesis. *Cell Host Microbe*. 2014;15(3):306-16. Epub 2014/03/19. doi:  
395 10.1016/j.chom.2014.02.008. PubMed PMID: 24629337.
- 396 26. Park JY, Forman D, Waskito LA, Yamaoka Y, Crabtree JE. Epidemiology of *Helicobacter*  
397 *pylori* and CagA-Positive Infections and Global Variations in Gastric Cancer. *Toxins (Basel)*.  
398 2018;10(4). Epub 2018/04/20. doi: 10.3390/toxins10040163. PubMed PMID: 29671784; PubMed  
399 Central PMCID: PMC5923329.
- 400 27. Jones KR, Whitmire JM, Merrell DS. A Tale of Two Toxins: *Helicobacter Pylori* CagA and  
401 VacA Modulate Host Pathways that Impact Disease. *Front Microbiol*. 2010;1:115. Epub 2010/01/01.  
402 doi: 10.3389/fmicb.2010.00115. PubMed PMID: 21687723; PubMed Central PMCID:  
403 PMC3109773.
- 404 28. Gwack J, Shin A, Kim CS, Ko KP, Kim Y, Jun JK, et al. CagA-producing *Helicobacter pylori*  
405 and increased risk of gastric cancer: a nested case-control study in Korea. *Br J Cancer*.  
406 2006;95(5):639-41. Epub 2006/08/16. doi: 10.1038/sj.bjc.6603309. PubMed PMID: 16909137;  
407 PubMed Central PMCID: PMC2360680.
- 408 29. Shiota S, Murakami K, Okimoto T, Kodama M, Yamaoka Y. Serum *Helicobacter pylori*  
409 CagA antibody titer as a useful marker for advanced inflammation in the stomach in Japan. *J*  
410 *Gastroenterol Hepatol*. 2014;29(1):67-73. Epub 2013/09/17. doi: 10.1111/jgh.12359. PubMed PMID:  
411 24033876; PubMed Central PMCID: PMC3870047.

- 412 30. Yoshida T, Kato J, Inoue I, Yoshimura N, Deguchi H, Mukoubayashi C, et al. Cancer  
413 development based on chronic active gastritis and resulting gastric atrophy as assessed by serum  
414 levels of pepsinogen and Helicobacter pylori antibody titer. *Int J Cancer*. 2014;134(6):1445-57. Epub  
415 2013/09/07. doi: 10.1002/ijc.28470. PubMed PMID: 24009139.
- 416 31. Butt J, Blot WJ, Shrubsole MJ, Waterboer T, Pawlita M, Epplein M. Differences in antibody  
417 levels to H. pylori virulence factors VacA and CagA among African Americans and whites in the  
418 Southeast USA. *Cancer Causes Control*. 2020. Epub 2020/03/31. doi: 10.1007/s10552-020-01295-z.  
419 PubMed PMID: 32222845.
- 420 32. Del Moral-Hernandez O, Castanon-Sanchez CA, Reyes-Navarrete S, Martinez-Carrillo DN,  
421 Betancourt-Linares R, Jimenez-Wences H, et al. Multiple infections by EBV, HCMV and  
422 Helicobacter pylori are highly frequent in patients with chronic gastritis and gastric cancer from  
423 Southwest Mexico: An observational study. *Medicine (Baltimore)*. 2019;98(3):e14124. Epub  
424 2019/01/18. doi: 10.1097/MD.00000000000014124. PubMed PMID: 30653141; PubMed Central  
425 PMCID: PMC6370051.
- 426 33. Vedham V, Divi RL, Starks VL, Verma M. Multiple infections and cancer: implications in  
427 epidemiology. *Technol Cancer Res Treat*. 2014;13(2):177-94. Epub 2013/08/08. doi:  
428 10.7785/tcrt.2012.500366. PubMed PMID: 23919392.
- 429 34. Du Y, Agnew A, Ye XP, Robinson PA, Forman D, Crabtree JE. Helicobacter pylori and  
430 Schistosoma japonicum co-infection in a Chinese population: helminth infection alters humoral  
431 responses to H. pylori and serum pepsinogen I/II ratio. *Microbes Infect*. 2006;8(1):52-60. Epub  
432 2005/11/02. doi: 10.1016/j.micinf.2005.05.017. PubMed PMID: 16260169.
- 433 35. Mbulaiteye SM, Gold BD, Pfeiffer RM, Brubaker GR, Shao J, Biggar RJ, et al. H. pylori-  
434 infection and antibody immune response in a rural Tanzanian population. *Infect Agent Cancer*.  
435 2006;1:3. Epub 2006/12/08. doi: 10.1186/1750-9378-1-3. PubMed PMID: 17150132; PubMed  
436 Central PMCID: PMC6370051.
- 437



438 **Figure Legends**

439 **Figure 1. *H. pylori* seropositivity by gender and age.** Star indicates statistically significant  
440 difference between genders in age 25-44,  $p=0.03$  (Fisher's exact test). Horizontal brackets indicate  
441 statistically significant differences between the youngest (0-14) and oldest (45+) age groups for both  
442 genders: Males:  $p=0.02$ , females:  $p= 0.01$  (Wilcoxon two sample signed rank sum test).

443

444 **Figure. 2. Distribution of antibody responses ( $\log_{10}$ MFI) in *H. pylori* positive and antigen  
445 positive individuals.** Horizontal lines denote median and vertical lines denote interquartile range  
446 (IQR).

447

448 **Figure 3. A. Seroprevalence of co-infection in *H. pylori* seropositive individuals (n=1679).** EBV:  
449 Epstein Barr Virus, KSHV: Kaposi's Sarcoma-associated Herpesvirus, HSV-2: Herpes Simplex  
450 Virus-2, HBV: Hepatitis B virus, HPV: Human papilloma virus, MCV: Merkel Cell polyoma virus,  
451 HIV: Human Immunodeficiency virus, HCV: Hepatitis C virus and HTLV-1: Human T-cell  
452 Lymphotropic virus. **B. Burden of infection.** Infection count represents the number of infections the  
453 individuals tested positive for.

454

455

456

457

458

459

460

461

462

463

464

465

466 **Tables**

467

**Table.1 Characteristics of samples in the GPC (n=7211)**

| Variable                       | Category | N    | %  | HP+(%) |
|--------------------------------|----------|------|----|--------|
| <b>Sex</b>                     | Female   | 3689 | 51 | 94     |
|                                | Male     | 3522 | 49 | 96     |
| <b>Age [Years]</b>             | 0-14     | 3129 | 43 | 93     |
|                                | 15-24    | 1509 | 21 | 98     |
|                                | 25-44    | 1307 | 18 | 96     |
|                                | 45+      | 1266 | 18 | 95     |
| <b><i>H. pylori</i> Status</b> | Positive | 6834 | 95 | 100    |
|                                | Negative | 377  | 5  | -      |
| <b>Census Year</b>             | 1992     | 1920 | 27 | 94     |
|                                | 2000     | 2342 | 33 | 96     |
|                                | 2008     | 2949 | 41 | 94     |

<sup>a</sup>*H. pylori* seropositivity determined as antibody reactivity with at least 4 antigens

\*Fisher's exact test, comparison of Hp- and Hp+ sera.

468

**Table.2 Seroprevalence of antibodies to *H. pylori* antigens by HP serostatus**

| Seroprevalence (%) |          |               |              |                           |             |         |
|--------------------|----------|---------------|--------------|---------------------------|-------------|---------|
| Antigen            | Name     | Cut-off [MFI] | All (n=7211) | Hp+ <sup>a</sup> (n=6834) | Hp- (n=377) | P*      |
| HP0547             | CagA     | 2592          | 90           | 100                       | 28          | <0.0001 |
| HP0010             | GroEL    | 100           | 62           | 69                        | 6           | <0.0001 |
| HP1564             | HP1564   | 188           | 83           | 93                        | 18          | <0.0001 |
| HP0887             | VacA     | 541           | 89           | 99                        | 22          | <0.0001 |
| HP0305             | HP0305   | 100           | 45           | 51                        | 2           | <0.0001 |
| HP0410             | HpaA     | 100           | 56           | 63                        | 7           | <0.0001 |
| HP0522             | Cagδ     | 500           | 90           | 99                        | 46          | <0.0001 |
| HP0695             | HyuA     | 191           | 48           | 54                        | 7           | <0.0001 |
| HP0537             | CagM     | 158.75        | 65           | 72                        | 20          | <0.0001 |
| HP0875             | Catalase | 455           | 64           | 71                        | 22          | <0.0001 |
| HP0231             | HP0231   | 100           | 65           | 73                        | 7           | <0.0001 |
| HP1098             | HcpC     | 100           | 40           | 44                        | 0           | <0.0001 |
| HP0243             | NapA     | 100           | 43           | 49                        | 6           | <0.0001 |
| HP0073             | UreA     | 340           | 50           | 57                        | 14          | <0.0001 |

469

| <b>Table 3. Predictors of antibody response levels to <i>H. pylori</i> antigens in seropositive individuals</b> |                                   |                    |                    |                          |                              |                    |
|-----------------------------------------------------------------------------------------------------------------|-----------------------------------|--------------------|--------------------|--------------------------|------------------------------|--------------------|
| <b>Variable</b>                                                                                                 | <b>Age Group: Ref =0-14 years</b> |                    |                    | <b>Sex:<br/>Ref=Male</b> | <b>Census Year: Ref=1990</b> |                    |
| <b>Antigen</b>                                                                                                  | <b>15-24</b>                      | <b>25-44</b>       | <b>45+</b>         | <b>Female</b>            | <b>2000</b>                  | <b>2008</b>        |
| <b>CagA</b>                                                                                                     |                                   |                    |                    |                          |                              |                    |
| OR (95% C.I)                                                                                                    | 0.98 (0.96 - 0.99)                | 0.96 (0.95 - 0.98) | 0.91 (0.90 - 0.93) | 1.00 (0.99 - 1.01)       | 1.03 (1.01 - 1.04)           | 1.04 (1.03 - 1.06) |
| p-value                                                                                                         | 0.002                             | <0.001             | <0.001             | 0.540                    | <0.001                       | <0.001             |
| <b>GroEL</b>                                                                                                    |                                   |                    |                    |                          |                              |                    |
| OR (95% C.I)                                                                                                    | 1.08 (1.04 - 1.11)                | 1.06 (1.03 - 1.1)  | 1.10 (1.06 - 1.14) | 0.98 (0.96 - 1.01)       | 1.04 (1.01 - 1.07)           | 1.11 (1.07 - 1.14) |
| p-value                                                                                                         | <0.001                            | 0.001              | <0.001             | 0.153                    | 0.019                        | <0.001             |
| <b>HP1564</b>                                                                                                   |                                   |                    |                    |                          |                              |                    |
| OR (95% C.I)                                                                                                    | 0.95 (0.92 - 0.97)                | 0.89 (0.87 - 0.92) | 0.86 (0.84 - 0.89) | 0.93 (0.91 - 0.95)       | 1.02 (0.99 - 1.05)           | 0.99 (0.97 - 1.02) |
| p-value                                                                                                         | <0.001                            | <0.001             | <0.001             | <0.001                   | 0.146                        | 0.699              |
| <b>VacA</b>                                                                                                     |                                   |                    |                    |                          |                              |                    |
| OR (95% C.I)                                                                                                    | 1.01 (0.99 - 1.03)                | 0.99 (0.97 - 1.01) | 0.97 (0.94 - 0.99) | 0.98 (0.97 - 1.00)       | 1.03 (1.01 - 1.05)           | 1 (0.98 - 1.02)    |
| p-value                                                                                                         | 0.224                             | 0.399              | 0.002              | 0.019                    | 0.004                        | 0.701              |
| <b>HP0305</b>                                                                                                   |                                   |                    |                    |                          |                              |                    |
| OR (95% C.I)                                                                                                    | 0.94 (0.91 - 0.98)                | 0.94 (0.90 - 0.98) | 0.95 (0.91 - 1.00) | 0.94 (0.91 - 0.97)       | 1.01 (0.97 - 1.05)           | 1.05 (1.01 - 1.09) |
| p-value                                                                                                         | 0.004                             | 0.004              | 0.041              | <0.001                   | 0.523                        | 0.013              |
| <b>HpaA</b>                                                                                                     |                                   |                    |                    |                          |                              |                    |
| OR (95% C.I)                                                                                                    | 1.03 (0.99 - 1.06)                | 0.98 (0.94 - 1.02) | 1.02 (0.98 - 1.06) | 0.97 (0.95 - 1.00)       | 1.04 (1.00 - 1.07)           | 1.03 (0.99 - 1.06) |
| p-value                                                                                                         | 0.106                             | 0.290              | 0.257              | 0.023                    | 0.026                        | 0.102              |
| <b>CagD</b>                                                                                                     |                                   |                    |                    |                          |                              |                    |
| OR (95% C.I)                                                                                                    | 1.03 (1.01 - 1.05)                | 1.04 (1.02 - 1.06) | 1.03 (1.01 - 1.05) | 0.95 (0.93 - 0.96)       | 1.01 (1.00 - 1.03)           | 0.98 (0.97 - 1.00) |
| p-value                                                                                                         | 0.002                             | 0.001              | 0.005              | <0.001                   | 0.143                        | 0.112              |
| <b>HyuA</b>                                                                                                     |                                   |                    |                    |                          |                              |                    |
| OR (95% C.I)                                                                                                    | 1.02 (0.98 - 1.06)                | 1.12 (1.07 - 1.16) | 1.15 (1.10 - 1.19) | 0.96 (0.93 - 0.99)       | 1.01 (0.97 - 1.05)           | 1.02 (0.98 - 1.06) |
| p-value                                                                                                         | 0.254                             | <0.001             | <0.001             | 0.003                    | 0.613                        | 0.325              |
| <b>CagM</b>                                                                                                     |                                   |                    |                    |                          |                              |                    |
| OR (95% C.I)                                                                                                    | 1.01 (0.98 - 1.04)                | 0.99 (0.96 - 1.03) | 0.99 (0.96 - 1.03) | 0.98 (0.96 - 1.01)       | 1.01 (0.98 - 1.04)           | 1.03 (1.00 - 1.06) |
| p-value                                                                                                         | 0.408                             | 0.746              | 0.686              | 0.151                    | 0.475                        | 0.022              |
| <b>Catalase</b>                                                                                                 |                                   |                    |                    |                          |                              |                    |
| OR (95% C.I)                                                                                                    | 0.98 (0.96 - 1.01)                | 0.98 (0.95 - 1.01) | 0.99 (0.96 - 1.02) | 0.97 (0.95 - 0.99)       | 1.01 (0.99 - 1.04)           | 1.03 (1.01 - 1.06) |
| p-value                                                                                                         | 0.169                             | 0.173              | 0.485              | 0.001                    | 0.319                        | 0.008              |
| <b>HP0231</b>                                                                                                   |                                   |                    |                    |                          |                              |                    |
| OR (95% C.I)                                                                                                    | 0.96 (0.93 - 1.00)                | 0.93 (0.89 - 0.97) | 1.00 (0.96 - 1.04) | 0.97 (0.94 - 1.00)       | 1.01 (0.98 - 1.05)           | 1.06 (1.03 - 1.1)  |
| p-value                                                                                                         | 0.028                             | 0.001              | 0.838              | 0.023                    | 0.515                        | <0.001             |
| <b>HcpC</b>                                                                                                     |                                   |                    |                    |                          |                              |                    |

|              |                    |                    |                    |                    |                    |                    |
|--------------|--------------------|--------------------|--------------------|--------------------|--------------------|--------------------|
| OR (95% C.I) | 1.00 (0.95 - 1.05) | 1.06 (1.00 - 1.13) | 1.13 (1.07 - 1.20) | 0.96 (0.92 - 1.00) | 1.03 (0.98 - 1.09) | 1.04 (0.99 - 1.09) |
| p-value      | 0.924              | 0.049              | <0.001             | 0.044              | 0.219              | 0.137              |
| <b>NapA</b>  |                    |                    |                    |                    |                    |                    |
| OR (95% C.I) | 1.13 (1.07 - 1.20) | 1.14 (1.07 - 1.21) | 1.13 (1.06 - 1.20) | 1.00 (0.95 - 1.04) | 0.98 (0.92 - 1.03) | 1.00 (0.95 - 1.06) |
| p-value      | <0.001             | <0.001             | <0.001             | 0.813              | 0.389              | 0.879              |
| <b>UreA</b>  |                    |                    |                    |                    |                    |                    |
| OR (95% C.I) | 1.01 (0.98 - 1.04) | 1.02 (0.99 - 1.05) | 1.07 (1.04 - 1.10) | 0.97 (0.95 - 0.99) | 1.00 (0.97 - 1.03) | 1.02 (0.99 - 1.05) |
| p-value      | 0.395              | 0.159              | <0.001             | 0.012              | 0.864              | 0.120              |

470

471

**Table 4. The influence of co-infection on antibody response levels to virulent *H. pylori* antigens (N=1679)**

| Antigen                    | CagA               |         | VacA                  |         | GroEL                 |         | HcpC                  |         | HP1564                |         |
|----------------------------|--------------------|---------|-----------------------|---------|-----------------------|---------|-----------------------|---------|-----------------------|---------|
| Variable                   | OR (95% CI)        | p-value | OR (95% CI)           | p-value | OR (95% CI)           | p-value | OR (95% CI)           | p-value | OR (95% CI)           | p-value |
| Age                        | 0.999 (0.997 - 1)  | 0.007   | 0.998 (0.997 - 0.999) | 0.001   | 1.001 (0.998 - 1.004) | 0.330   | 0.996 (0.993 - 0.999) | 0.003   | 0.995 (0.992 - 0.997) | <0.001  |
| <b>Sex: Ref=Male</b>       |                    |         |                       |         |                       |         |                       |         |                       |         |
| Female                     | 0.98 (0.94 - 1.02) | 0.282   | 0.98 (0.94 - 1.02)    | 0.414   | 1.00 (0.9 - 1.1)      | 0.923   | 0.90 (0.81 - 1)       | 0.050   | 0.84 (0.77 - 0.91)    | <0.001  |
| <b>Year: Ref=1992</b>      |                    |         |                       |         |                       |         |                       |         |                       |         |
| 2000                       | 1.03 (0.96 - 1.12) | 0.389   | 1.07 (0.98 - 1.16)    | 0.111   | 1.2 (0.98 - 1.48)     | 0.083   | 1.00 (0.82 - 1.23)    | 0.980   | 1.06 (0.9 - 1.25)     | 0.459   |
| 2008                       | 1.08 (1.01 - 1.16) | 0.034   | 1.05 (0.97 - 1.13)    | 0.239   | 1.47 (1.21 - 1.78)    | <0.001  | 1.06 (0.88 - 1.28)    | 0.535   | 1.03 (0.89 - 1.19)    | 0.707   |
| <b>HIV: Ref=Negative</b>   |                    |         |                       |         |                       |         |                       |         |                       |         |
| Positive                   | 0.86 (0.8 - 0.93)  | <0.001  | 0.90 (0.82 - 0.97)    | 0.010   | 0.94 (0.76 - 1.16)    | 0.539   | 0.68 (0.55 - 0.83)    | <0.001  | 0.75 (0.64 - 0.88)    | 0.001   |
| <b>HSV-2: Ref=Negative</b> |                    |         |                       |         |                       |         |                       |         |                       |         |
| Positive                   | 1.10 (1.05 - 1.15) | <0.001  | 1.11 (1.05 - 1.16)    | <0.001  | 1.18 (1.04 - 1.34)    | 0.011   | 1.02 (0.9 - 1.15)     | 0.782   | 1.06 (0.96 - 1.17)    | 0.246   |
| <b>HPV: Ref=Negative</b>   |                    |         |                       |         |                       |         |                       |         |                       |         |
| Positive                   | 1.04 (1 - 1.09)    | 0.032   | 1.16 (1.11 - 1.21)    | <0.001  | 1.30 (1.16 - 1.45)    | <0.001  | 1.07 (0.96 - 1.19)    | 0.231   | 1.12 (1.03 - 1.22)    | 0.007   |
| <b>EBV: Ref=Negative</b>   |                    |         |                       |         |                       |         |                       |         |                       |         |
| Positive                   | 0.94 (0.87 - 1.01) | 0.099   | 1.09 (1 - 1.18)       | 0.050   | 0.87 (0.7 - 1.08)     | 0.208   | 1.08 (0.88 - 1.34)    | 0.454   | 0.96 (0.81 - 1.13)    | 0.608   |
| <b>KSHV: Ref=Negative</b>  |                    |         |                       |         |                       |         |                       |         |                       |         |
| Positive                   | 1.05 (0.98 - 1.12) | 0.189   | 1.09 (1.01 - 1.18)    | 0.030   | 1.08 (0.87 - 1.34)    | 0.492   | 0.89 (0.73 - 1.08)    | 0.280   | 1.02 (0.87 - 1.19)    | 0.847   |

|                             |                          |           |                          |           |                          |       |                          |           |                          |           |
|-----------------------------|--------------------------|-----------|--------------------------|-----------|--------------------------|-------|--------------------------|-----------|--------------------------|-----------|
|                             | 1.13)                    |           | 1.19)                    |           | 1.32)                    |       | 1.1)                     |           | 1.19)                    |           |
| <b>HBV: Ref=Negative</b>    |                          |           |                          |           |                          |       |                          |           |                          |           |
| <b>Positive</b>             | 1.00<br>(0.93 -<br>1.07) | 0.99<br>6 | 0.97<br>(0.9 -<br>1.04)  | 0.38<br>2 | 1.19<br>(0.98 -<br>1.44) | 0.081 | 1.08<br>(0.89 -<br>1.3)  | 0.42<br>7 | 1.16 (1 -<br>1.34)       | 0.04<br>8 |
| <b>MCV: Ref=Negative</b>    |                          |           |                          |           |                          |       |                          |           |                          |           |
| <b>Positive</b>             | 0.97<br>(0.91 -<br>1.03) | 0.34<br>1 | 1.02<br>(0.96 -<br>1.09) | 0.51<br>8 | 1.19 (1 -<br>1.41)       | 0.046 | 1.04<br>(0.88 -<br>1.23) | 0.66<br>4 | 1.03<br>(0.91 -<br>1.18) | 0.61<br>8 |
| <b>HCV: Ref=Negative</b>    |                          |           |                          |           |                          |       |                          |           |                          |           |
| <b>Positive</b>             | 1.00<br>(0.92 -<br>1.09) | 0.98<br>4 | 0.99<br>(0.9 -<br>1.09)  | 0.90<br>5 | 0.94<br>(0.74 -<br>1.2)  | 0.626 | 0.98<br>(0.77 -<br>1.25) | 0.87<br>9 | 0.94<br>(0.78 -<br>1.14) | 0.55<br>2 |
| <b>HTLV-1: Ref=Negative</b> |                          |           |                          |           |                          |       |                          |           |                          |           |
| <b>Positive</b>             | 0.83<br>(0.66 -<br>1.03) | 0.09<br>3 | 1.28<br>(1.01 -<br>1.62) | 0.04<br>3 | 0.93 (0.5<br>- 1.7)      | 0.807 | 0.80<br>(0.44 -<br>1.46) | 0.47<br>2 | 0.76<br>(0.48 -<br>1.22) | 0.26<br>0 |

472

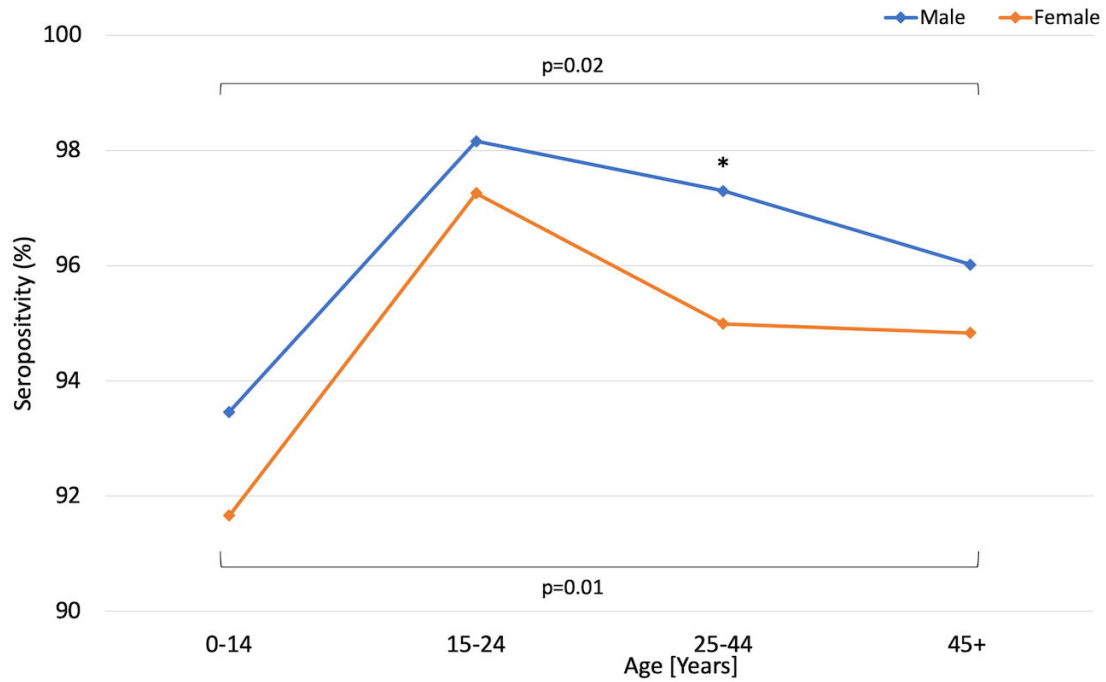

Antibody Response ( $\log_{10}$  MFI)

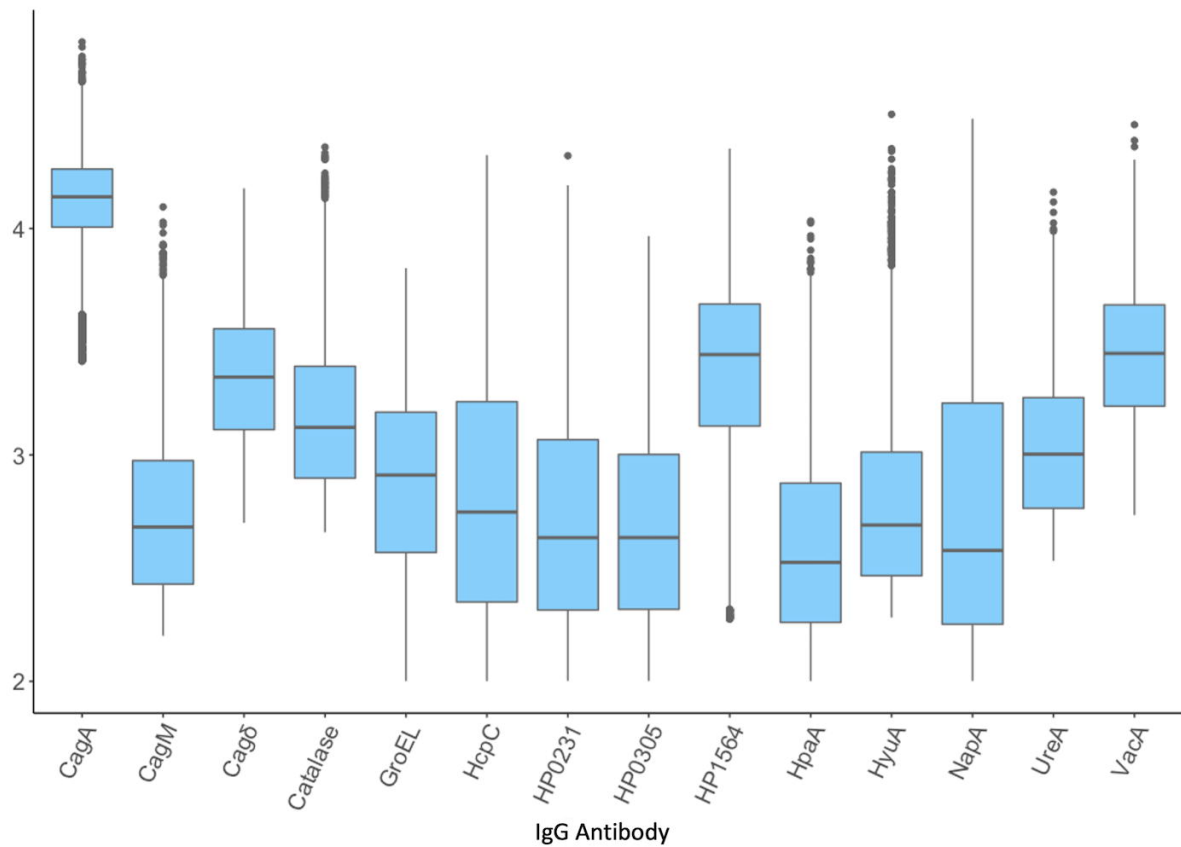

**A**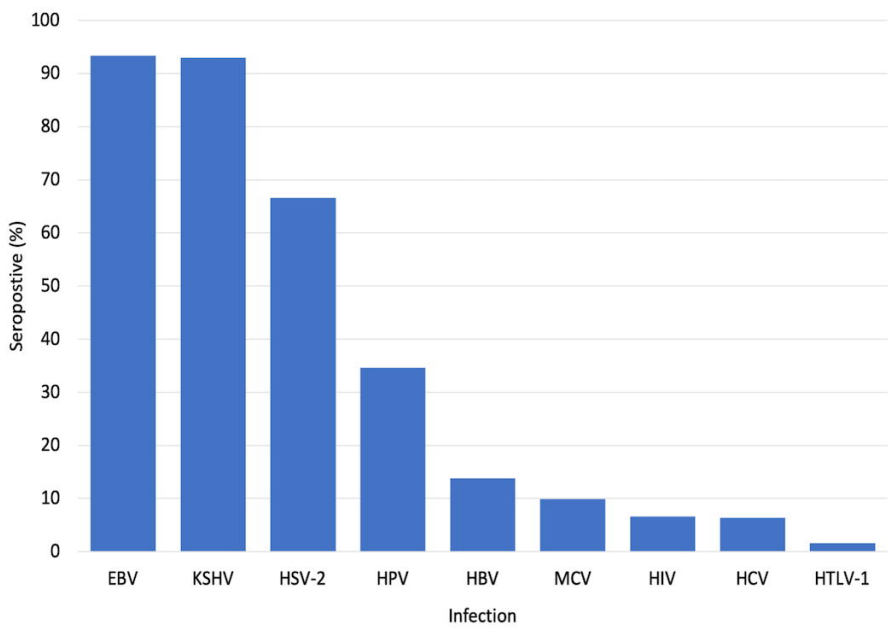**B**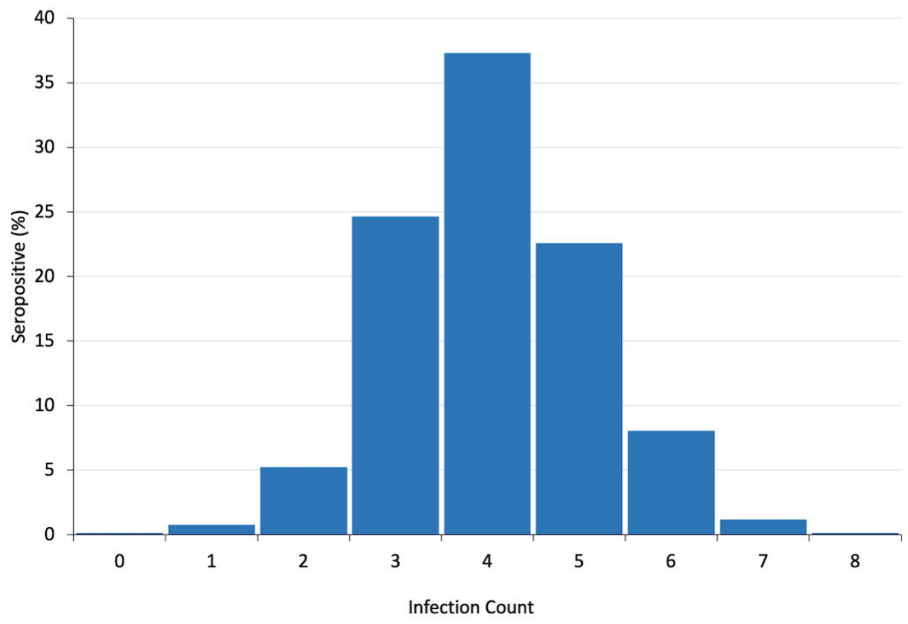

Source: https://biorxiv.org/content/10.1101/2021.03.01.433355v1.full.pdf
